1 **High throughput sequencing based detection of SARS-CoV-2 prevailing in**  
2 **wastewater of Pune, West India**

3

4 Tanmay Dharmadhikari<sup>1</sup>; Vinay Rajput<sup>1</sup>; Rakeshkumar Yadav<sup>1,2</sup>; Radhika Boaragaonkar<sup>3</sup>;  
5 Dayanand Panse<sup>3</sup>; Sanjay Kamble<sup>4</sup>; Syed Dastager<sup>1,2</sup>; Mahesh Dharme<sup>1,2, \*</sup>

6 1. National Collection of Industrial Microorganisms (NCIM), Biochemical Sciences Division,  
7 CSIR-National Chemical Laboratory, Pune, India.

8 2. Academy of Scientific and Innovative Research (AcSIR), Ghaziabad, India.

9 3. Ecosan Services Foundation (ESF), Pune, India.

10 4. Chemical Engineering and Process Development Division, CSIR-National Chemical  
11 Laboratory, Pune, India.

12

13

14 Corresponding Author Details

15 Mahesh Dharme: [ms.dharme@ncl.res.in](mailto:ms.dharme@ncl.res.in)

16 NCIM Resource Center, CSIR – National Chemical Laboratory

17 Dr Homi Bhabha Rd, NCL Colony, Pashan, Pune, Maharashtra 411008 (India)

18

19

20

21

22 **Abstract:**

23 Given a large number of SARS-CoV-2 infected individuals, clinical detection has proved  
24 challenging. The wastewater-based epidemiological paradigm would cover the clinically  
25 escaped asymptomatic individuals owing to the faecal shedding of the virus. We  
26 hypothesised using wastewater as a valuable resource for analysing SARS-CoV-2 mutations  
27 circulating in the wastewater of Pune region (Maharashtra; India), one of the most affected  
28 during the covid-19 pandemic. We conducted a case study in open wastewater drains from  
29 December 2020-March 2021 to assess the presence of SARS-CoV-2 nucleic acid and further  
30 detect mutations using ARTIC protocol of MinION sequencing. The analysis revealed 108  
31 mutations across six samples categorised into 40 types of mutations. We report the  
32 occurrence of mutations associated with B.1.617 lineage in March-2021 samples,  
33 simultaneously also reported as a Variant of Concern (VoC) responsible for the rapid increase  
34 in infections. The study also revealed four mutations; S:N801, S:C480R, NSP14:C279F and  
35 NSP3:L550del not currently reported from wastewater or clinical data in India but reported in  
36 the world. Further, a novel mutation NSP13:G206F mapping to NSP13 region was observed  
37 from wastewater. Notably, S:P1140del mutation was observed in December 2020 samples  
38 while it was reported in February 2021 from clinical data, indicating the instrumentality of  
39 wastewater data in early detection. This is the first study in India to conclude that wastewater-  
40 based epidemiology to identify mutations associated with SARS-CoV-2 virus from  
41 wastewater as an early warning indicator system.

42

43 **Keywords:** wastewater, epidemiology, nanopore sequencing, metagenomics, SARS-CoV-  
44 2, ARTIC protocol

45

## 46 **1. Introduction**

47 The respiratory distress virus, Severe Acute Respiratory Syndrome – Corona Virus – 2  
48 (SARS-CoV-2), has unprecedented effects on human life and the healthcare system  
49 worldwide. The findings of Tang et al. 2020 revealed the high viral load in the faecal matter  
50 of infected individual, irrespective of the individuals showing any symptoms. The wastewater  
51 containing viral load from infected individuals would enter the wastewater system of well-  
52 planned sewage treatment plants or directly into the river system as untreated wastewater,  
53 raising concerns worldwide. The diagnostics are limited to the clinical context, and the  
54 wastewater system was hypothesised to gain insight into the thorough infection dynamics of  
55 the population. The Wastewater-based Epidemiological (WBE) approach would provide a  
56 comprehensive depiction of infection dynamics in the population by enabling asymptomatic  
57 individuals to be included, who would otherwise escape the clinical settings. The WBE  
58 approach was previously employed to identify illicit drug use and specific infective agents  
59 like SARS and Polio (Zuccato et al 2005, Heijnen and Medema 2009, Lago et al. 2003). This  
60 led towards the foundation of the WBE tool quickly for a better understanding of SARS-  
61 CoV-2 spread worldwide.

62 It was crucial to evaluate the current wastewater viral concentration protocols to optimize  
63 viral detection of the novel virus, and the work started promptly. Warish et al. 2020 provided  
64 an evidence-based protocol for concentrating Murine Hepatitis Virus, a positive sense single-  
65 stranded enveloped virus, as a surrogate for SARS-CoV-2, from wastewater using seven  
66 methods and the MCE protocol showed the highest recovery. Simultaneously, the work for  
67 isolating and concentrating SARS-CoV-2 from wastewater was also started worldwide. The  
68 statistical model-based evidence suggested by Peccia et al. 2020 provided insight into the  
69 correlation of the fluctuations observed in the number of infected individuals and viral load  
70 present in the wastewater. Detection of SARS-CoV-2 from the wastewater was also carried

71 out worldwide to indicate the viral presence. Wastewater is the metagenomic landscape with  
72 various organisms; hence, detecting specific viral nucleic acids posed a challenge (Che et al.  
73 2019). The MinION sequencer from Oxford Nanopore Technologies can be very useful in  
74 such scenarios as the total genomic material from the sample can be sequenced to identify the  
75 potential candidate (Che et al. 2019). Here, the development of ARTIC protocol facilitated  
76 the study of the metagenomic landscape of SARS-CoV-2 from wastewater utilizing amplicon  
77 sequencing to obtain amplified whole-genome fragments and analyse the mutations (Tyson et  
78 al. 2020, Josh Quick 2020).

79 Multiple mutations of SARS-CoV-2 were observed worldwide and raised concerns about the  
80 effectiveness of treatment and vaccines. Particular mutants were speculated for the increased  
81 infection spread, such as the rapid spread of the B.1.617 lineage variant by mediating the  
82 increment of viral entry into certain cell lines (Hoffmann et al. 2021). Studies were also  
83 performed for the effectiveness of vaccine candidates among the Variants of Concern (VOC),  
84 such as the effectiveness of BBV152 (Covaxin) being able to generate neutralising  
85 serological response against B.1.617 lineage (Yadav et al. 2021). The tracking of genomic  
86 variants from wastewater was assumed essential to understand the spread. The phylogenetic  
87 assessment of SARS-CoV-2 from wastewater was carried out by Nemudryi et al. 2020 using  
88 a long-read sequencing platform. Further, genomic variants were studied using Next  
89 Generation Sequencing (NGS) platforms by Agrawal et al. 2021 in Germany, Landgraff et al.  
90 2021 in Canada, Wilton et al. 2021 in London, Crits-Christoph et al. 2021 in California, Jahn  
91 et al. 2021 in Switzerland and others. The studies were essential to analyse the regionally  
92 prevalent mutations in circulation, aiding the assumption of Variants of Concerns as causal  
93 elements in rising cases in the region.

94 Presently India is one of the worst affected countries globally, and the Pune region in the  
95 state of Maharashtra recorded one of the highest CoViD19 infections (The Times of India:

96 Maharashtra reports the highest single-day spike of 63,729 Covid-19 cases). It was necessary  
97 to evaluate the wastewater from Pune city to understand the infection dynamics and focus on  
98 the mutations circulating in the population. However, no studies are currently being recorded  
99 in India, allowing the mutation analysis of SARS-CoV-2 from wastewater. To emphasise the  
100 importance of the mutation study from wastewater, we present the first study in India for the  
101 amplicon-based metagenomic landscape of SARS-CoV-2 in the wastewater of the Pune  
102 region.

103 We hypothesised that wastewater in Pune, being a highly affected region, would demonstrate  
104 SARS-CoV-2 RNA presence, which eventually could be employed to analyse the genomic  
105 mutations. Our goal was to examine the presence of SARS-CoV-2 RNA in the wastewater  
106 streams and employ the NGS platform of the MinION sequencer to identify mutations. The  
107 study could provide essential information regarding the mutations circulating in the  
108 community while also examining the potential source of wastewater as an early warning  
109 system.

## 110 **2. Material and Methods**

111

112 **Figure 1. Process includes sample collection from two sites. The sample were processed**  
113 **and genomic mutations were analysed**

### 114 **2.1 Sample Collection and Processing**

115 The Sampling site Deccan (18.506492,73.836359; Kothrud Basin) and Near Deccan  
116 (18.512711,73.840699; Prabhat Road Basin) are open wastewater drains entering the Mutha  
117 river near the sample collection site. The wastewater samples WW9, WW10 and WWP  
118 (WW1, WW2 and WW3 except for WW4) were collected from the Deccan site and WW8,

119 WW10, WW12 and WW4 (from WWP) from the Near Deccan site. A total of 12 composite  
120 samples were collected as 1 litre- 1hour grab sample between morning 09:00 am to 10:00 am  
121 in a sterile plastic container (Himedia Solution Bottles - TCP040-1x12NO) throughout  
122 December 2020 to March 2021 (Rimoldi et al. 2020). The sample bottles were thoroughly  
123 cleaned from outside by 70% alcohol and 1% hypochlorite solution and transported to the  
124 laboratory at 4°C. The container with wastewater samples was kept in the water bath for 60  
125 minutes at 60°C for heat inactivation (Wang et al. 2020). After the heat treatment, the bottles  
126 were allowed to cool down to room temperature and were immediately processed. The  
127 permissions regarding sample collection and processing were obtained from Pune Municipal  
128 Corporation, and Institutional Biosafety and Ethical Committee.

## 129 **2.2 Virus Concentration**

130 An aliquot of 200ml was transferred into a sterile Fluorinated HDPE Bottle (Capacity 250:  
131 Tarson; 584230) and centrifuged at 4500g for 10 min to settle down larger debris. The sample  
132 was then filtered through Whatman filter paper (Millipore; 1001-070-100/pk (Grade 1  
133 Circles, 70mm Whatman)) using the vacuum filtration assembly (Tarson; Membrane Filter  
134 Holder - 47 mm- 500ML) and Vacuum pump. The filtrate was transferred into a sterile glass  
135 flask, and MgCl<sub>2</sub> was added. The sample was then filtered through a 0.45um Mixed Cellulose  
136 Ester filter (Millipore; MILLIPORE MEMBRANE FILTER, MIXED CELLULOSE ESTER  
137 (0.45 µm, 47 mm)). The MCE filter was immediately transferred to a bead beating tube from  
138 the RNA extraction kit. Contaminated glassware and plastic wares were decontaminated or  
139 disposed according to the institutional regulations.

## 140 **2.3 RNA extraction and Realtime-qPCR**

141 RNeasy Power Water Kit (Qiagen; 14700-50-NF) was used for RNA extraction following the  
142 instruction by the manufacturer. The RNA was eluted in 100 µl of RNase free water and

143 stored at -80°C until further molecular process. The Real-time quantitative Polymerase Chain  
144 Reaction (RT-qPCR) was performed for the detection of SARS-CoV-2. The eluted RNA  
145 stored at -80 °C was thawed on ice. The SARS-CoV-2 specific ICMR validated kit  
146 TRUPCR® SARS-CoV-2 RT qPCR kit (V-3.2) (3B BlackBio Biotech India Limited; 3B306)  
147 was used for detection on Applied Biosystem™ 7500 plus (Applied Biosystems). The  
148 threshold for cycle cut-off was set manually, and positive samples were detected. The SARS-  
149 CoV-2 positive RNA was employed further for the Oxford Nanopore Sequencing platform  
150 using ARTIC protocol (Tyson et al. 2020, Josh Quick 2020).

#### 151 **2.4 cDNA and Nanopore Library Preparation**

152 According to manufacturer instructions, the Real-time-qPCR positive RNA from six samples  
153 was subjected to cDNA preparation using Maxima H minus Reverse Transcriptase Enzyme  
154 (Thermofisher; EP0752). The cDNA prepared was then purified using Agencourt Ampure XP  
155 beads (Beckman Coulter; A63881). The purified cDNA was further subjected to nCoV-2019  
156 sequencing protocol v3 (LoCost) V.3, which uses two primer pool to amplify the fragments  
157 of SARS-CoV-2 whole genome present in sample (Tyson et al. 2020, Josh Quick 2020). The  
158 reverse-transcribed cDNA was amplified using Q5 High-Fidelity DNA Polymerase (New  
159 England Biolabs; M0491S), 5X Q5 Reaction Buffer (New England Biolabs; M0491S),  
160 dNTPs mix (New England Biolabs; N0447S) and primer pools 40 U/ul SARS-CoV-2 primers  
161 (Pool A & B) 100uM (ARCTIC) (New England Biolabs; GTR\_066\_COVID25). The  
162 amplified pools were mixed and purified using Agencourt Ampure XP beads (Beckman  
163 Coulter; A63881). End preparation and Barcoding was performed using Blunt/TA Ligase  
164 MasterMix (New England Biolabs; M0367L), NEBNext Ultra II End Repair/dA-Tailing  
165 Module (New England Biolabs; E7546L) and Native Barcoding Expansion 1-12 (PCR-free)  
166 (Oxford Nanopore Technologies; EXP-NBD104). The quantification was performed with  
167 Qubit Fluorometer (Invitrogen), and the 24ng library was loaded onto the flow cell. The

168 barcoded samples were pooled together, and the run was set up on the MinION device  
169 (Oxford Nanopore Technologies). The sequencing was allowed to run for 24 hrs, and data  
170 was collected. The raw reads from the Nanopore sequencer were base-called using Guppy  
171 High Accuracy - dna\_r9.4.1\_450bps\_hac.cfg, and further analysis was carried out using  
172 ARTIC Bioinformatic Pipeline with few required modifications (Tyson et al. 2020, Josh  
173 Quick 2020). All the sequences obtained were analysed with reference to the SARS-CoV-2  
174 reference genome Wuhan-Hu-1 (NCBI Accession: MN908947). The GSAID database was  
175 utilised to obtain information regarding the reported mutation and was last accessed on 01st  
176 May 2021.

### 177 **3. Results**

178 The Ct values of the samples are provided in the supplementary Table 1. All the wastewater  
179 samples in the study collected between December 2020 through March 2021 consistently  
180 were positive for SARS-CoV-2 nucleic acid fragments. The cycle threshold values obtained  
181 have shown variability attributed to the changing infection dynamics. The amplicon  
182 sequenced SRA data is submitted to the NCBI database with accession number  
183 SRA:PRJNA728440. The analysis revealed several mutations in multiple genomic regions of  
184 SARS-CoV-2, including 3'UTR, ORF1a, ORF1b, Spike, ORF3a, ORF7a, M, ORF6, N,  
185 ORF8 and 3'UTR. In total, 108 mutations, categorised into 40 types based on nucleotide  
186 position, were detected in all the samples (details in Supplementary Table 3). We detected 15  
187 mutations from WW8, 19 mutations from WW9, 17 mutations from WW10, 20 mutations  
188 from WW11, 23 mutations from WW12 and 13 mutations from WW-P. Notably, nine  
189 mutations in the Spike region (S: L452R, S:C480R, S: E484Q, S: D614G, S: P681R, S:  
190 N801, S: D950N, S: Q1071H, S: P1140) were observed in this study. The March-2021  
191 samples showed L452R and E484Q mutations, while these mutations were absent in the  
192 sample collected from December-2020 to February-2021 (WW-P). We detected five novel



193 mutations not reported from Indian clinical sequence data on Global Initiative on Sharing  
 194 Avian flu Data (GISAID) (Shu and McCauley 2017). These mutations are as follows: 23964  
 195 AT>A (S: N801del), 4369 TG>T (NSP3:L550), 18875 C>T (NSP14:C279F), 16852/16853  
 196 GG>TT (NSP15:C206F), 23000 T>C (S:C480R).

| 5'UTR                    | ORF                      | NSP                                                                     | N       | S                  | M      | 3'UTR                       | Samples                    |
|--------------------------|--------------------------|-------------------------------------------------------------------------|---------|--------------------|--------|-----------------------------|----------------------------|
| 5'-UTR:210<br>5'-UTR:241 | ORF3a:S26L               | NSP3:Y246Y<br>NSP12b:P314L                                              |         | S:P1140del         |        |                             | Common for All Samples     |
|                          |                          | NSP13:M429I                                                             |         | S:L452R<br>S:E484Q |        | 3'UTR:28270                 | WW8, WW9, WW10, WW11, WW12 |
|                          |                          |                                                                         |         | S:D614G            |        |                             | WWP, WW8, WW9, WW10, WW11  |
|                          |                          | NSP3:T749I<br>NSP6:T77A                                                 |         | S:Q1071H           |        |                             | WW8, WW9, WW10, WW11       |
|                          | ORF6:I33T<br>ORF7a:V82A  |                                                                         |         |                    |        |                             | WW9, WW10, WW11            |
|                          |                          |                                                                         |         |                    |        | 3'UTR:29742                 | WW8, WW9, WW11             |
|                          | ORF3a:E261*<br>ORF8:S97I | NSP3:H1630H<br>NSP10:H80H                                               |         |                    |        |                             | WWP                        |
| 5'-UTR:75                |                          | NSP3:L550del<br>NSP13:P77L<br>NSP13:G206F<br>NSP13:V484F<br>NSP14:C279F |         | S:C480R<br>S:D950N | M:V10A | 3'-UTR:21555<br>3'UTR:26493 | WW12                       |
|                          |                          | NSP14:C279C                                                             |         |                    |        |                             | WWP, WW12                  |
|                          |                          |                                                                         |         | S:N801             |        |                             | WWP, WW10                  |
|                          |                          | NSP3:P822L                                                              |         |                    |        |                             | WW11, WW12                 |
|                          |                          |                                                                         | N:R203M |                    |        | 3'-UTR:29700                | WW9                        |
|                          |                          |                                                                         | N:D63G  | S:P681R            |        |                             | WW11                       |

197

198 **Table 1. Mutations identified in the six samples collected from December 2020**  
 199 **throughout March 2021.**

200 **4. Discussion**

201 The wastewater-based epidemiological approach can predict the population's infection  
202 dynamics (Peccia et al. 2020). However, an exact estimation of the infected individuals is  
203 currently unattainable. The study to estimate exact viral load using recovery of concentration  
204 protocols and sustainability of virus from the faecal source of infected individuals to the  
205 endpoint of sewage treatment plant has not been carried out. However, the WBE study can be  
206 applied to obtain comparative infection dynamics of a particular region to obtain information  
207 regarding the severity of affected regions (Peccia et al. 2020). Since the wastewater has  
208 shown consistent viral presence, as seen in samples taken from December 2020 through  
209 March 2021, it is essential to bring the public attention to the viral presence and create  
210 awareness. The study also provided instances where the mutations obtained from the  
211 wastewater sequenced data are either not reported in GISAID from India or, in case of novel  
212 mutation, not across the world.

213 The WBE study can provide us with information regarding mutations indicating genomic  
214 variants in the population (Hoffman et al. 2021, Agrawat et al. 2021, Landgraff et al. 2021,  
215 Wilton et al. 2021, Crits-Christoph et al. 2021 and Jahn et al. 2021). The clinical evaluation  
216 of variants in circulation, where asymptomatic can be overlooked, along with the time-  
217 consuming protocols of sequencing, together creates an arduous exercise. Maharashtra (India)  
218 has recorded very high cases of infection, and it has been raised concern as variants of  
219 B.1.617 lineage to be a causal factor (Indian Express: 20. Explained: B.1.617 variant and  
220 the Covid-19 surge in India). The present wastewater sequencing analysis revealed mutations  
221 L452R and E484Q associated with B.1.617 lineage in samples collected during March 2021,  
222 while the mutations were absent in samples collected from December 2020 to February 2021.  
223 The clinical sequencing data also observed higher infections with B.1.617 lineage from a  
224 similar period. Here, it can be observed that regular wastewater monitoring for identifying  
225 mutations can be a critical resource, as it can act as an early warning system. Hence, regular

226 monitoring of wastewater is an essential criterion to observe mutations associated with  
227 concerned variants in circulation as the required results can be obtained from a smaller  
228 sample volume of wastewater than the more significant number of individuals.

229 The mutations S:P1140del was reported in late February 2021 from clinical data in India and  
230 earlier only from Africa-Egypt and North America (GISAID - Shu and McCauley 2017).

231 However, the mutation, mapped to the Spike region, was present in all the samples collected  
232 from December 2020 to March 2021. This observation provides evidence of how wastewater  
233 sequencing data identify the mutations indicating possible variant in circulation before being

234 observed through clinical data. WW12 sample was collected in the last week of March 2021  
235 and has 12 mutations unique to the sample, in which NSP3:L550del, NSP14:C279F and  
236 S:C480R are not presently reported from India (GISAID - Shu and McCauley 2017). We also

237 report a novel mutation NSP13:G206F (NSP13 region) detected in the WW12 sample. This  
238 occurrence of a novel mutation across the wastewater sample can be an instance of mutations  
239 observed before they are identified clinically. The WWP is the pooled sample from WW1,

240 WW2, WW3 and WW4 from Deccan and Near Deccan site presenting clinically reported 13  
241 mutations, and we also report the mutation S:N801 (Spike region), not presently reported  
242 from India (GISAID - Shu and McCauley 2017). WW9 has shown mutation N:R203M and

243 3'-UTR:29700, while WW11 has shown mutation S:P618R and N:D63G, present in samples  
244 collected during March 2021, which were absent in sample WWP taken before that. It can be  
245 predicted that the mentioned mutations prevailed in wastewater from March 2021 and might

246 have been absent before. These mutations have not been reported from India, while they were  
247 reported in other countries (GISAID - Shu and McCauley 2017). This detection of mutation  
248 from wastewater sample provides an instance where clinically neglected mutations can be

249 observed in wastewater sample, providing thorough information for mutations present in  
250 circulation.

251 Studies have observed that variants of the SARS-CoV-2 virus showed distinct infectivity  
252 effects (Hoffmann et al. 2021). In order to understand the circulating mutations of SARS-  
253 CoV-2, the wastewater system can provide thorough information regarding the mutations and  
254 analysing variants. The methods used in the experiment followed the protocols of Ahmed et  
255 al. 2020 for viral concentration. The virus concentration using MCE electronegative filtration  
256 provides a mean recovery of  $65.7\% \pm 23.8$  (Mean  $\pm$  SD of % recovery) of the viral particles  
257 from the sample (Ahmed et al. 2020). Regular surveillance can increase the possibility of  
258 concentrating virus to observe prominent mutations. The studies conducted in India have  
259 reported the viral presence across the STPs or wastewater. However, no studies have yet  
260 revealed NGS platform sequencing to identify the mutations in circulation from wastewater  
261 (Srivastava et al. 2021, Chakraborty et al. 2021, Hemalatha et al. 2021, Arora et al. 2020 and  
262 Kumar et al. 2020). Our study is the first to report mutations through WBE, provide insight  
263 into circulating variants, and report novel mutations.

## 264 **5. Conclusion**

265 Wastewater can be considered a vital source to understand the mutations in circulation and  
266 understand the infection dynamics. The prevalence of particular mutations in circulation and  
267 clinically unreported mutations have been reported in this wastewater study of SARS-CoV-2,  
268 providing conclusive evidence for the potential utilization of wastewater. We also report  
269 novel mutations such as NSP13:G206F (NSP13), which conclude the capability of  
270 wastewater sequencing data to provide mutations in circulation before they are observed  
271 clinically. Regular monitoring of wastewater system for analysing mutations can act as an  
272 early warning system to understand the community infection dynamics.

273 **Conflict of interest:** The authors declare that they have no conflicts of interest.

274 **Funding:** This project is funded by Science Engineering and Research Board (SERB), India  
275 under special covid grant (CVD/2020/001002).

276 **Author Contributions:** All authors have read and review the manuscript for submission.  
277 TD: performing experiments, writing original draft and art design; RKY: performing  
278 experiments, editing and review; VR: bioinformatic analysis, review and editing; RB: review;  
279 DP: review; SK: study plan and review; SD: review and funding; MD: editing, review,  
280 funding and corresponding author

281 **Acknowledgements:** Authors are indebted to the Director, CSIR-NCL for providing  
282 facilities, infrastructure and support. Authors thank Pune Municipal Corporation for  
283 providing the required permissions and partnering organisation Ecosan Services Foundation  
284 for their support in obtaining permissions and sampling. TD, VR and RKY acknowledge  
285 SERB and University Grant Commission (UGC), India respectively for fellowship support.  
286 Authors also extend acknowledgement to BioRender.com for creation of images. Authors  
287 thank Mr. Nitya Jacob, India Coordinator, Sustainable Sanitation Alliance (SuSanA) India  
288 Chapter for providing technical guidance in the study.

289

## 290 **References**

291 Agrawal S, Orschler L, Lackner S. Metatranscriptomic Analysis Reveals SARS-CoV-2  
292 Mutations in Wastewater of the Frankfurt Metropolitan Area in Southern Germany.  
293 Microbiology Resource Announcements. 2021 Apr;10(15). doi: 10.1128/MRA.00280-21

294 Ahmed W, Bertsch PM, Bivins A, Bibby K, Farkas K, Gathercole A, Haramoto E,  
295 Gyawali P, Korajkic A, McMinn BR, Mueller JF. Comparison of virus concentration  
296 methods for the RT-qPCR-based recovery of murine hepatitis virus, a surrogate for

297 SARS-CoV-2 from untreated wastewater. *Science of The Total Environment*. 2020 Oct  
298 15;739:139960. <https://doi.org/10.1016/j.scitotenv.2020.139960>

299 Arora S, Nag A, Sethi J, Rajvanshi J, Saxena S, Shrivastava SK, Gupta AB. Sewage  
300 surveillance for the presence of SARS-CoV-2 genome as a useful wastewater based  
301 epidemiology (WBE) tracking tool in India. *Water Science and Technology*. 2020 Dec  
302 15;82(12):2823-36. <https://doi.org/10.2166/wst.2020.540>

303 Chakraborty P, Pasupuleti M, Shankar MJ, Bharat GK, Krishnasamy S, Dasgupta SC,  
304 Sarkar SK, Jones KC. First surveillance of SARS-CoV-2 and organic tracers in  
305 community wastewater during post lockdown in Chennai, South India: Methods,  
306 occurrence and concurrence. *Science of The Total Environment*. 2021 Jul 15;778:146252.  
307 <https://doi.org/10.1016/j.scitotenv.2021.146252>

308 Che Y, Xia Y, Liu L, Li AD, Yang Y, Zhang T. Mobile antibiotic resistome in  
309 wastewater treatment plants revealed by Nanopore metagenomic sequencing.  
310 *Microbiome*. 2019 Dec;7(1):1-3. <https://doi.org/10.1186/s40168-019-0663-0>

311 Crits-Christoph A, Kantor RS, Olm MR, Whitney ON, Al-Shayeb B, Lou YC, Flamholz  
312 A, Kennedy LC, Greenwald H, Hinkle A, Hetzel J. Genome sequencing of sewage detects  
313 regionally prevalent SARS-CoV-2 variants. *MBio*. 2021 Jan;12(1). doi:  
314 10.1128/mBio.02703-20

315 Explained: B.1.617 variant and the Covid-19 surge in India  
316 [https://indianexpress.com/article/explained/maharashtra-double-mutant-found-b-1-617-  
317 variant-and-the-surge-7274080/](https://indianexpress.com/article/explained/maharashtra-double-mutant-found-b-1-617-variant-and-the-surge-7274080/) (last accessed on 29 May 2020)

318 Heijnen L, Medema G. Surveillance of influenza A and the pandemic influenza A  
319 (H1N1) 2009 in sewage and surface water in the Netherlands. *Journal of water and health*.  
320 2011 Sep;9(3):434-42. <https://doi.org/10.2166/wh.2011.019>

- 321 Hemalatha M, Kiran U, Kuncha SK, Kopperi H, Gokulan CG, Mohan SV, Mishra RK.  
322 Surveillance of SARS-CoV-2 spread using wastewater-based epidemiology:  
323 Comprehensive study. *Science of The Total Environment*. 2021 May 10;768:144704.  
324 <https://doi.org/10.1016/j.scitotenv.2020.144704>
- 325 Hoffmann M, Hofmann-Winkler H, Krüger N, Kempf A, Nehlmeier I, Graichen L,  
326 Sidarovich A, Moldenhauer AS, Winkler MS, Schulz S, Jäck HM. SARS-CoV-2 variant  
327 B. 1.617 is resistant to Bamlanivimab and evades antibodies induced by infection and  
328 vaccination. *bioRxiv*. 2021 Jan 1. doi: <https://doi.org/10.1101/2021.05.04.442663>
- 329 Jahn K, Dreifuss D, Topolsky I, Kull A, Ganesanandamoorthy P, Fernandez-Cassi X,  
330 Bänziger C, Stachler E, Fuhrmann L, Jablonski KP, Chen C. Detection of SARS-CoV-2  
331 variants in Switzerland by genomic analysis of wastewater samples. *medRxiv*. 2021 Jan  
332 1. doi: <https://doi.org/10.1101/2021.01.08.21249379>
- 333 Kumar M, Patel AK, Shah AV, Raval J, Rajpara N, Joshi M, Joshi CG. First proof of the  
334 capability of wastewater surveillance for COVID-19 in India through detection of genetic  
335 material of SARS-CoV-2. *Science of The Total Environment*. 2020 Dec 1;746:141326.  
336 <https://doi.org/10.1016/j.scitotenv.2020.141326>
- 337 Lago PM, Gary Jr HE, Pérez LS, Cáceres V, Olivera JB, Puentes RP, Corredor MB,  
338 Jiménez P, Pallansch MA, Cruz RG. Poliovirus detection in wastewater and stools  
339 following an immunization campaign in Havana, Cuba. *International journal of  
340 epidemiology*. 2003 Oct 1;32(5):772-7. <https://doi.org/10.1093/ije/dyg185>
- 341 Landgraff C, Wang LY, Buchanan C, Wells M, Schonfeld J, Bessonov K, Ali J, Robert E,  
342 Nadon C. Metagenomic sequencing of municipal wastewater provides a near-complete  
343 SARS-CoV-2 genome sequence identified as the B. 1.1. 7 variant of concern from a

- 344 Canadian municipality concurrent with an outbreak. medRxiv. 2021 Jan 1. doi:  
345 <https://doi.org/10.1101/2021.03.11.21253409>
- 346 Maharashtra reports highest single-day spike of 63,729 Covid  
347 [https://timesofindia.indiatimes.com/city/mumbai/maharashtra-reports-highest-single-day-](https://timesofindia.indiatimes.com/city/mumbai/maharashtra-reports-highest-single-day-spike-of-63729-covid-19-cases/articleshow/82106311.cms)  
348 [spike-of-63729-covid-19-cases/articleshow/82106311.cms](https://timesofindia.indiatimes.com/city/mumbai/maharashtra-reports-highest-single-day-spike-of-63729-covid-19-cases/articleshow/82106311.cms) (last accessed on 29 May  
349 2020)
- 350 Nemudryi A, Nemudraia A, Wiegand T, Surya K, Buyukyoruk M, Cicha C, Vanderwood  
351 KK, Wilkinson R, Wiedenheft B. Temporal detection and phylogenetic assessment of  
352 SARS-CoV-2 in municipal wastewater. Cell Reports Medicine. 2020 Sep 22;1(6):100098.  
353 <https://doi.org/10.1016/j.xcrm.2020.100098>
- 354 Peccia J, Zulli A, Brackney DE, Grubaugh ND, Kaplan EH, Casanovas-Massana A, Ko  
355 AI, Malik AA, Wang D, Wang M, Warren JL. Measurement of SARS-CoV-2 RNA in  
356 wastewater tracks community infection dynamics. Nature Biotechnology. 2020  
357 Oct;38(10):1164-7. <https://doi.org/10.1038/s41587-020-0684-z>
- 358 Quick QJ. nCoV-2019 sequencing protocol v3 (LoCost). Protocols. io.
- 359 Rimoldi SG, Stefani F, Gigantiello A, Polesello S, Comandatore F, Mileto D, Maresca M,  
360 Longobardi C, Mancon A, Romeri F, Pagani C. Presence and infectivity of SARS-CoV-2  
361 virus in wastewaters and rivers. Science of the Total Environment. 2020 Nov  
362 20;744:140911. <https://doi.org/10.1016/j.scitotenv.2020.140911>
- 363 Shu Y, McCauley J. GISAID: Global initiative on sharing all influenza data—from vision  
364 to reality. Eurosurveillance. 2017 Mar 30;22(13):30494. (GISAID last accessed on 01  
365 May 2021) <https://doi.org/10.2807/1560-7917.ES.2017.22.13.30494>



366 Srivastava V, Gupta S, Patel AK, Joshi M, Kumar M. Comparative analysis of SARS-  
367 CoV-2 RNA load in wastewater from three different cities of Gujarat, India. medRxiv.  
368 2021 Jan 1. doi: <https://doi.org/10.1101/2021.04.08.21254861>

369 Tang AN, Tong ZD, Wang HL, Dai YX, Li KF, Liu JN, Wu WJ, Yuan C, Yu ML, Li P,  
370 Yan JB. Detection of novel coronavirus by RT-PCR in stool specimen from  
371 asymptomatic child, China. Emerging infectious diseases. 2020 Jun;26(6):1337. doi:  
372 10.3201/eid2606.200301

373 Tyson JR, James P, Stoddart D, Sparks N, Wickenhagen A, Hall G, Choi JH, Lapointe H,  
374 Kamelian K, Smith AD, Prystajacky N. Improvements to the ARTIC multiplex PCR  
375 method for SARS-CoV-2 genome sequencing using nanopore. bioRxiv. 2020 Sep 4. doi:  
376 10.1101/2020.09.04.283077

377 Wang T, Lien C, Liu S, Selveraj P. Effective heat inactivation of SARS-CoV-2. Medrxiv.  
378 2020 Jan 1. doi: <https://doi.org/10.1101/2020.04.29.20085498>

379 Wilton T, Bujaki E, Klapsa D, Fritzsche M, Mate R, Martin J. Rapid increase of SARS-  
380 CoV-2 variant B. 1.1. 7 detected in sewage samples from England between October 2020  
381 and January 2021. medRxiv. 2021 Jan 1. doi:  
382 <https://doi.org/10.1101/2021.03.03.21252867>

383 Yadav P, Sapkal GN, Abraham P, Ella R, Deshpande G, Patil DY, Nyayanit D, Gupta N,  
384 Sahay RR, Shete AM, Panda S. Neutralization of variant under investigation B. 1.617  
385 with sera of BBV152 vaccinees. bioRxiv. 2021 Jan 1. doi:  
386 <https://doi.org/10.1101/2021.04.23.441101>

387 Zuccato E, Chiabrando C, Castiglioni S, Calamari D, Bagnati R, Schiarea S, Fanelli R.  
388 Cocaine in surface waters: a new evidence-based tool to monitor community drug abuse.  
389 Environmental Health. 2005 Dec;4(1):1-7. <https://doi.org/10.1186/1476-069X-4-14>

# Sample Points

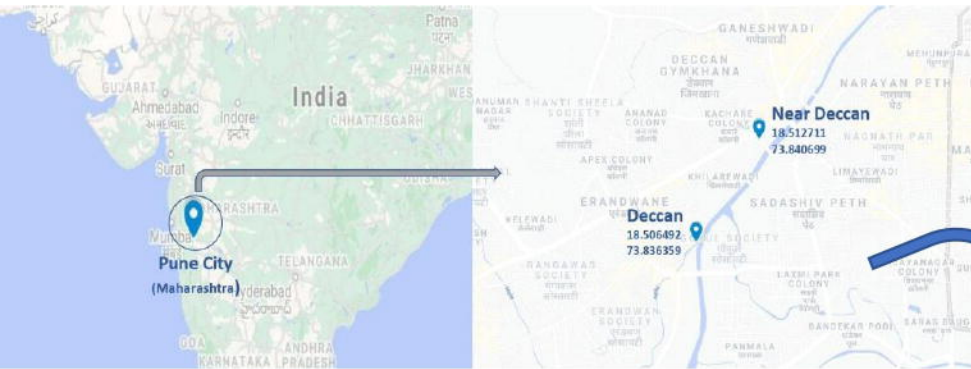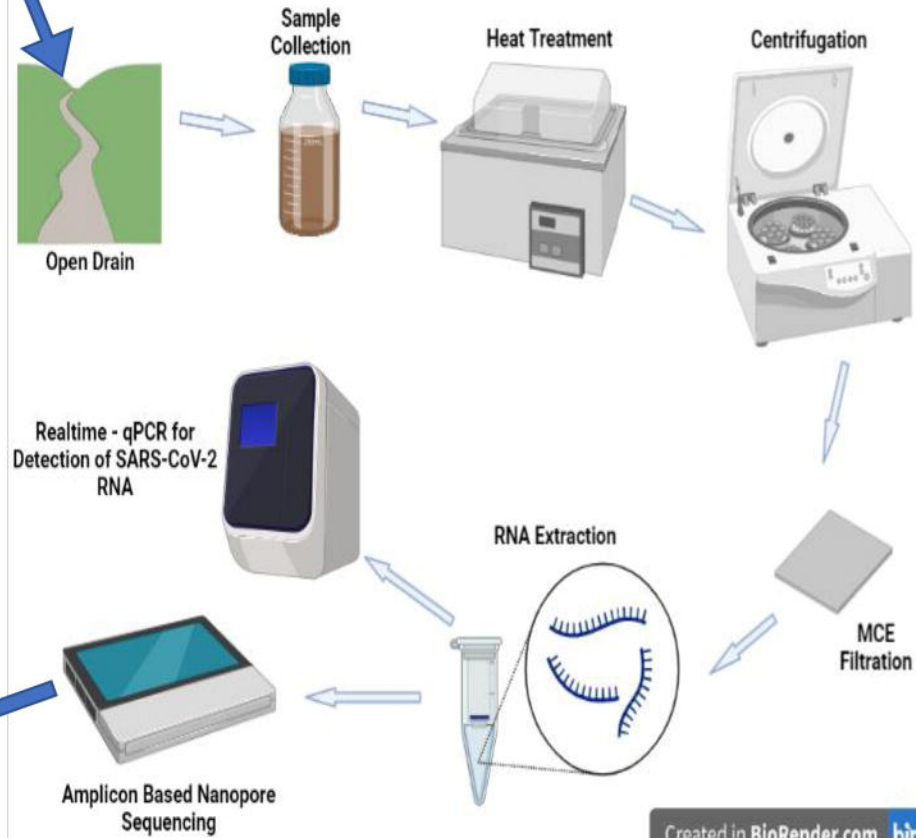

## Identifying Mutations across Genomic Regions of SARS-CoV-2

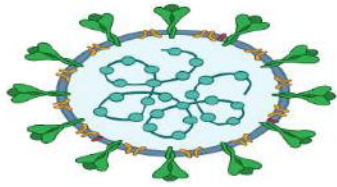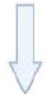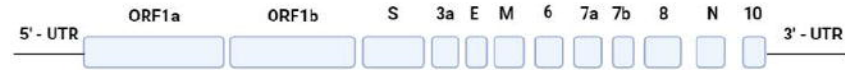

Source: https://medrxiv.org/content/10.1101/2021.06.08.21258563.full.pdf
